# Supplementary material for: A Learning Program for Treatment Recommendations by Molecular Tumor Boards and Artificial Intelligence
Source: PubMed Central journal article supplement — JAMA Oncol. 2023 Nov 30;10(1):95–102. doi: 10.1001/jamaoncol.2023.5120 (PMC10690580; doi:10.1001/jamaoncol.2023.5120), 2023-11-30
Supplement: jamaoncol-e235120-s001.pdf [file jamaoncol-e235120-s001.pdf]

## Supplementary Online Content

Sunami K, Naito Y, Saigusa Y, et al. A learning program on for treatment recommendations by molecular tumor boards and artificial intelligence. *JAMA Oncol*. Published online November 30, 2023. doi:10.1001/jamaoncol.2023.5120

**eFigure 1.** Improvement in Concordance

**eFigure 2.** Improvement in Concordance of Treatment Recommendations for Cases With High ELs and Low ELs

**eTable 1.** Evidence Levels Based on Clinical Practice Guidance for Next-Generation Sequencing in Cancer Diagnosis and Treatment (Edition 2.1)

**eTable 2.** List of Simulated Cases in Prelearning and Postlearning

**eTable 3.** List of Central Treatment Recommendations of High Frequent Genomic Alterations

**eTable 4.** Concordance Rate in Postlearning

**eTable 5.** Univariable Analysis for Factors Associated With Concordance Rate

**eTable 6.** Concordance of Treatment Recommendations for AMG 650

**eMethods.** Details of Multivariable Mixed-Effects Model

This supplementary material has been provided by the authors to give readers additional information about their work.

**eFigure 1. Improvement in Concordance**

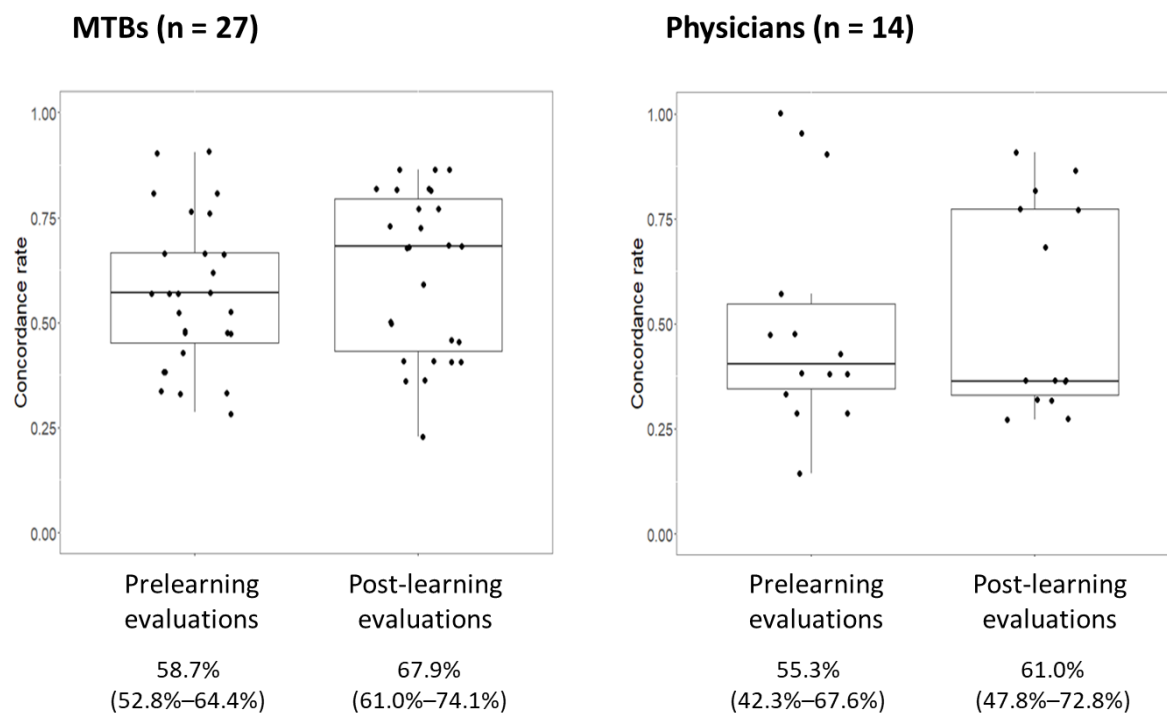

**eFigure 2.** Improvement in Concordance of Treatment Recommendations for Cases With High ELs and Low ELs

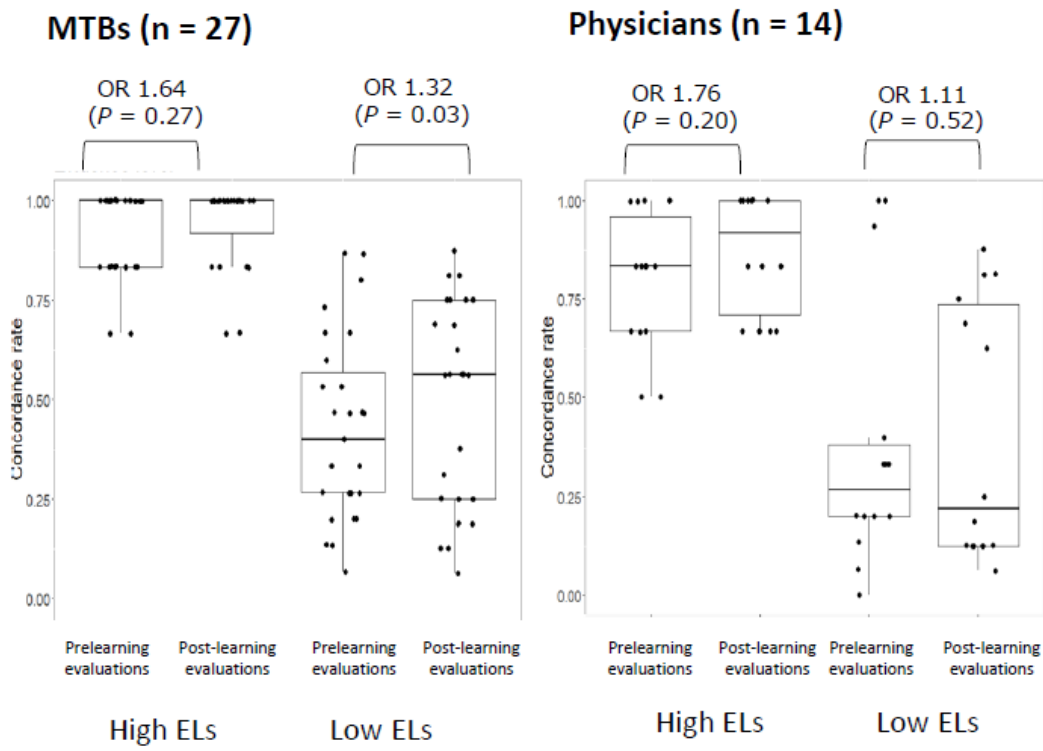

**eTable 1.** Evidence Levels Based on Clinical Practice Guidance for Next-Generation Sequencing in Cancer Diagnosis and Treatment (Edition 2.1)

| Level    | Criterion                                                                                                                                                                                                                                                                                                    |
|----------|--------------------------------------------------------------------------------------------------------------------------------------------------------------------------------------------------------------------------------------------------------------------------------------------------------------|
| <b>A</b> | <p>There is a drug approved in Japan for a specific tumor type</p> <p>There is a drug approved by the FDA for a specific tumor type</p> <p>A specific tumor type is included in the guidelines</p>                                                                                                           |
| <b>B</b> | <p>There have been clinical studies and meta-analyses of high statistical reliability and is a consensus among experts for a specific tumor type</p>                                                                                                                                                         |
| <b>C</b> | <p>There is a drug approved in Japan or by the FDA for another tumor type</p> <p>There have been clinical studies and meta-analyses of high statistical reliability and is a consensus among experts for another tumor type</p> <p>Usefulness has been shown in a small clinical study in any tumor type</p> |
| <b>D</b> | <p>Usefulness has been shown in case reports in any tumor type</p>                                                                                                                                                                                                                                           |
| <b>E</b> | <p>Usefulness has been reported in preclinical studies (in vitro or in vivo)</p>                                                                                                                                                                                                                             |
| <b>F</b> | <p>Known to be related to cancerous changes</p>                                                                                                                                                                                                                                                              |
| <b>R</b> | <p>Known to be related to drug resistance</p>                                                                                                                                                                                                                                                                |

**eTable 2.** List of Simulated Cases in Prelearning and Postlearning

|              | No. | Cancer type | genomic alterations                             | Central treatment recommendations<br>as of April 2021 | Central treatment recommendations<br>as of August 2021 |
|--------------|-----|-------------|-------------------------------------------------|-------------------------------------------------------|--------------------------------------------------------|
| Pre-learning | 1   | Lung        | KRAS G12C                                       | AMG510 (sotorasib), JDQ443, BI3011441                 | AMG510 (sotorasib), JDQ443, BI3011441                  |
|              | 2   | Lung        | ERBB2 A775_G776insYVMA                          | Trastuzumab deruxtecan                                | Trastuzumab deruxtecan                                 |
|              | 3   | Lung        | TP53 R248W, FGF amp, STK11 D53fs*11             | Adavosertib, AMG650, TAS120                           | Adavosertib, AMG650                                    |
|              | 4   | Lung        | CD74-ROS1 fusion                                | Entrectinib, crizotinib                               | Entrectinib, crizotinib                                |
|              | 5   | Breast      | AKT1 E17K, CDH1 c.832+2T>C, PTEN E201fs*41      | TAS-117+TAS-120                                       | TAS-117+TAS-120                                        |
|              | 6   | Breast      | ERBB2 L755S                                     | Trastuzumab deruxtecan                                | Trastuzumab deruxtecan                                 |
|              | 7   | Colorectal  | KRAS G12D                                       | R: cetuximab, panitumumab                             | R: cetuximab, panitumumab                              |
|              | 8   | Prostate    | CHEK2 E275*, PTEN loss, FGF19/3/4 amplification | Olaparib, TAS-117+TAS-120                             | Olaparib, TAS-117+TAS-120                              |
|              | 9   | Gastric     | PIK3CA H1047R, FGFR3 K650M                      | TAS-117+TAS-120                                       | TAS-117+TAS-120                                        |
|              | 10  | Gastric     | TP53 R175H                                      | Adavosertib, AMG650                                   | Adavosertib, AMG650                                    |
|              | 11  | Gastric     | ERBB2 amp                                       | Trastuzumab deruxtecan                                | Trastuzumab deruxtecan                                 |
|              | 12  | Liver       | CTNNB1 S33C, TP53 R249S                         | E7386±lenvatinib, adavosertib, AMG650                 | E7386±lenvatinib, adavosertib, AMG650                  |
|              | 13  | Cervix      | PIK3CA E545K, KRAS G12V                         | SPYK04, BI3011441, TAS-117+TAS-120                    | SPYK04, BI3011441, TAS-117+TAS-120                     |
|              | 14  | Cervix      | KRAS G12D, TP53 R175H                           | SPYK04, BI3011441, AMG650, adavosertib                | SPYK04, BI3011441, AMG650, adavosertib                 |

|               |    |                    |                                                   |                                        |                                   |
|---------------|----|--------------------|---------------------------------------------------|----------------------------------------|-----------------------------------|
|               | 15 | Pancreas           | KRAS G12D, TP53 R196*                             | Adavosertib, AMG650                    | Adavosertib, AMG650               |
|               | 16 | Pancreas           | BRCA2 S2835* (germline)                           | Olaparib maintenance, niraparib        | Olaparib maintenance, niraparib   |
|               | 17 | CNS                | EGFR amp, EGFR A289V                              | No recommendation                      | No recommendation                 |
|               | 18 | CNS                | ATM splice site 6573-1G>A                         | No recommendation                      | AMG650, adavosertib               |
|               | 19 | Melanoma           | RAF1 rearrangement                                | Trametinib                             | Trametinib                        |
|               | 20 | Ovary              | BRCA2 L63* (germline), TP53 R248Q                 | Adavosertib, AMG650                    | Adavosertib, AMG650               |
|               | 21 | Ovary              | KRAS G12R, TP53 R175H                             | SPYK04, BI3011441, Adavosertib, AMG650 | Adavosertib, AMG650               |
|               | 22 | Soft tissue        | TP53 R248W, RB1 loss                              | Adavosertib, AMG650                    | Adavosertib, AMG650               |
|               | 23 | Cholangiocarcinoma | FGFR2-BICC1 fusion                                | Pemigatinib                            | Pemigatinib, TAS117+TAS120, E7090 |
|               | 24 | bladder cancer     | No significant genetic abnormalities are detected | No recommendation                      | No recommendation                 |
|               | 25 | Soft tissue        | No significant genetic abnormalities are detected | No recommendation                      | No recommendation                 |
| Post-learning | 1  | Lung               | EGFR L858R                                        | No recommendation                      | patritumab deruxtecan             |
|               | 2  | Lung               | BRAF G466A, KEAP1 G477D                           | SPYK04                                 | SPYK04, BI3011441                 |
|               | 3  | Lung               | EML4-ALK fusion                                   | Ceritinib, lorlatinib                  | Ceritinib, lorlatinib, brigatinib |
|               | 4  | Lung               | MET c.3028+2T>C                                   | Capmatinib, tepotinib                  | Capmatinib, tepotinib             |
|               | 5  | Breast             | PIK3CA H1047R, TP53 E339K                         | TAS-117+TAS-120, alpelisib+fulvestrant | TAS-117+TAS-120                   |
|               | 6  | Breast             | CDK12 R117fs*9, TP53 C275Y                        | Olaparib, Adavosertib, AMG650          | Olaparib, Adavosertib, AMG650     |

|    |            |                                        |                                                                            |                                                                                                                                     |
|----|------------|----------------------------------------|----------------------------------------------------------------------------|-------------------------------------------------------------------------------------------------------------------------------------|
| 7  | Colorectal | BRAF V600E                             | Encorafenib+Binimetinib+Cetuximab                                          | Encorafenib+Cetuximab+/-<br>Binimetinib<br>SPYK04, BI3011441,<br>BI3011441+BI1701963,                                               |
| 8  | Colorectal | KRAS G12A, TP53                        | SPYK04, BI3011441<br>R: cetuximab, panitumumab                             | TNO155+Spartalizumab/ribociclib<br>R: cetuximab, panitumumab<br>E7386, E7386+Lenvatinib, SPKY04,<br>BI3011441, BI3011441+BI1701963, |
| 9  | Colorectal | APC R1450*, RNF43 G659fs*41, KRAS G12S | E7386, E7386+Lenvatinib, SPKY04,<br>BI3011441<br>R: cetuximab, panitumumab | TNO155+Spartalizumab/ribociclib,<br>TAS117+TAS120,<br>R: cetuximab, panitumumab                                                     |
| 10 | Colorectal | MSI-high, MSH2 E580*                   | Pembrolizumab, nivolumab,<br>nivo+ipilimumab                               | Pembrolizumab, nivolumab,<br>nivo+ipilimumab                                                                                        |
| 11 | Prostate   | ATM E2444*                             | No recommendation                                                          | No recommendation                                                                                                                   |
| 12 | Gastric    | TP53 Y234C                             | Adavosertib, AMG650                                                        | Adavosertib, AMG650                                                                                                                 |
| 13 | Cervix     | ERBB2 S310F, TP53 Q331*                | Adavosertib, AMG650                                                        | Adavosertib, AMG650, T-Dxd,<br>BI1810631, tucatinib                                                                                 |
| 14 | Esophagus  | TP53 R175H, PIK3CA, FGF                | Adavosertib, AMG650                                                        | Adavosertib, AMG650, TAS120                                                                                                         |
| 15 | Esophagus  | CDKN2A loss, CDKN2B loss, MTAP loss    | No recommendation                                                          | No recommendation                                                                                                                   |
| 16 | Esophagus  | TP53 R196*                             | AMG650, adavosertib                                                        | AMG650, adavosertib                                                                                                                 |
| 17 | CNS        | BRAF V600E                             | Dabrafenib+Trametinib,<br>Encorafenib+Binimetinib                          | Dabrafenib+Trametinib,<br>Encorafenib+Binimetinib                                                                                   |
| 18 | CNS        | IDH1 R132H, TP53 R273C                 | LY3410738, AMG650, adavosertib                                             | LY3410738, AMG650, adavosertib                                                                                                      |

|    |                |                                                      |                                             |                                                               |
|----|----------------|------------------------------------------------------|---------------------------------------------|---------------------------------------------------------------|
| 19 | Melanoma       | BRAF V600E, BRCA1 L63*                               | Dabra+trame, encora+binime,<br>olaparib     | Dabrafenib + Trametinib,<br>Encorafenib+Binimetinib, olaparib |
| 20 | Melanoma       | NRAS Q61R, TP53 A189V                                | SPYK04, BI3011441, AMG650,<br>adavosertib   | SPYK04, BI3011441, AMG650,<br>adavosertib                     |
| 21 | Ovary          | NF1 1333fs*7                                         | SPYK04                                      | SPYK04                                                        |
| 22 | Soft tissue    | MDM2 amp, CDK4 amp                                   | BI907828 + BI754091 + BI754111,<br>BI907828 | BI907828+BI754091+BI754111,<br>BI907828                       |
| 23 | Thyroid        | CCDC6-RET fusion                                     | Serpercatinib                               | Serpercatinib, Prasetinib                                     |
| 24 | adrenal cortex | No significant genetic abnormalities are<br>detected | No recommendation                           | No recommendation                                             |
| 25 | Pancreas       | TP53 R273P, KRAS G12V                                | Adavosertib, AMG650                         | Adavosertib, AMG650, BI3011441,<br>BI3011441+BI1701963        |

---

R: non-recommended treatment due to resistance



**eTable 3.** List of Central Treatment Recommendations of High Frequent Genomic Alterations

| <b>Gene symbol</b>               | <b>Central TRs</b>                         | <b>Clinical trial information</b>                                        |
|----------------------------------|--------------------------------------------|--------------------------------------------------------------------------|
| <b><i>TP53</i></b>               | AMG650                                     | jRCT2031200176                                                           |
| <b><i>KRAS</i> (except G12C)</b> | SPYK04<br>BI3011441<br>BI1701963           | JapicCTI-205361/NCT04511845<br>NCT04742556<br>jRCT2031200385/NCT04835714 |
| <b><i>PIK3CA</i></b>             | TAS-117+TAS-120                            | JapicCTI-194864                                                          |
| <b><i>CDKN2A</i></b>             | —                                          | —                                                                        |
| <b><i>CDKN2B</i></b>             | —                                          | —                                                                        |
| <b><i>APC</i></b>                | E7386<br>E7386+E7080                       | JapicCTI-194659<br>JapicCTI-194859/NCT04008797                           |
| <b><i>ARID1A</i></b>             | —                                          | —                                                                        |
| <b><i>PTEN</i></b>               | TAS-117+TAS-120                            | JapicCTI-194864                                                          |
| <b><i>ERBB2</i></b>              | DS-8201a<br>Tucatinib                      | JapicCTI-194707<br>jRCT2031210113/NCT04579380                            |
| <b><i>MTAP</i></b>               | —                                          | —                                                                        |
| <b><i>NF1</i></b>                | —                                          | —                                                                        |
| <b><i>MYC</i></b>                | —                                          | —                                                                        |
| <b><i>RB1</i></b>                | —                                          | —                                                                        |
| <b><i>TERT</i></b>               | —                                          | —                                                                        |
| <b><i>CCND1</i></b>              | —                                          | —                                                                        |
| <b><i>EGFR</i></b>               | —                                          | —                                                                        |
| <b><i>FGF19</i></b>              | TAS117+TAS120                              | JapicCTI-194864                                                          |
| <b><i>ATM</i></b>                | BAY 1895344                                | JapicCTI-183998                                                          |
| <b><i>SMAD4</i></b>              | —                                          | —                                                                        |
| <b><i>FGF4</i></b>               | TAS117+TAS120                              | JapicCTI-194864                                                          |
| <b><i>BRCA2</i></b>              | —                                          | —                                                                        |
| <b><i>FGF3</i></b>               | TAS117+TAS120                              | JapicCTI-194864                                                          |
| <b><i>FBXW7</i></b>              | —                                          | —                                                                        |
| <b><i>BRAF class3</i></b>        | SPYK04                                     | JapicCTI-205361                                                          |
| <b><i>CTNNB1</i></b>             | E7386<br>E7386+E7080                       | JapicCTI-194659<br>JapicCTI-194859/NCT04008797                           |
| <b><i>MDM2</i></b>               | BI907828 + BI754091 + BI754111<br>BI907282 | JapicCTI-194836<br>NCT03449381                                           |
| <b><i>GNAS</i></b>               | —                                          | —                                                                        |
| <b><i>BRCA1</i></b>              | —                                          | —                                                                        |

|                     |                                                      |                                                       |
|---------------------|------------------------------------------------------|-------------------------------------------------------|
| <b>FGFR1</b>        | TAS117+TAS120<br>TAS120+Pembrolizumab<br>Erdafitinib | JapicCTI-194864<br>JapicCTI-195063<br>JapicCTI-205204 |
| <b>STK11</b>        | -                                                    | -                                                     |
| <b>AKT1</b>         | TAS117+TAS120                                        | JapicCTI-194864                                       |
| <b>PIK3R1</b>       | TAS117+TAS120                                        | JapicCTI-194864                                       |
| <b>NOTCH1</b>       | -                                                    | -                                                     |
| <b>CDK4</b>         | -                                                    | -                                                     |
| <b>SMARCA4</b>      | -                                                    | -                                                     |
| <b>RET</b>          | TAS0953/HM06<br>LOXO-292                             | NCT04683250<br>NCT03157128                            |
| <b>HRAS</b>         | SPYK04                                               | JapicCTI-205361                                       |
| <b>KMT2D (MLL2)</b> | -                                                    | -                                                     |
| <b>KDM6A</b>        | -                                                    | -                                                     |
| <b>NRAS</b>         | SPYK04<br>BI3011441                                  | JapicCTI-205361/NCT04511845<br>NCT04742556            |
| <b>PTCH1</b>        | -                                                    | -                                                     |
| <b>FGFR3</b>        | TAS117+TAS120<br>Erdafitinib                         | JapicCTI-194864<br>JapicCTI-205204                    |
| <b>BAP1</b>         | -                                                    | -                                                     |
| <b>PBRM1</b>        | -                                                    | -                                                     |
| <b>KIT</b>          | -                                                    | -                                                     |
| <b>EP300</b>        | -                                                    | -                                                     |
| <b>MUTYH</b>        | -                                                    | -                                                     |
| <b>FLT3</b>         | -                                                    | -                                                     |
| <b>CREBBP</b>       | -                                                    | -                                                     |
| <b>CCNE1</b>        | -                                                    | -                                                     |
| <b>IDH1</b>         | LY3410738                                            | jRCT2031200178/NCT04521686                            |
| <b>PDGFRA</b>       | -                                                    | -                                                     |
| <b>PRKCI</b>        | -                                                    | -                                                     |

- : genomically matched trials not available

**eTable 4.** Concordance Rate in Postlearning

|                     | Concordance rate (%) | 95% CI    |
|---------------------|----------------------|-----------|
| MTBs (n = 27)       | 67.9                 | 61.0–74.1 |
| Physicians (n = 14) | 57.5                 | 51.7–63.1 |
| AI (n = 1)          | 88                   | 68.7–96.1 |

MTB: molecular tumor board, AI: artificial intelligence, CI: confidence interval

**eTable 5.** Univariable Analysis for Factors Associated With Concordance Rate

|                      | Factors                        | OR    | 95% CI      | P-value |
|----------------------|--------------------------------|-------|-------------|---------|
| Group (n = 27)       | Post-learning v.s. Prelearning | 1.27  | 0.99–1.62   | 0.06    |
|                      | ELs low v.s. high              | 0.046 | 0.029–0.076 | <0.001  |
| Individuals (n = 14) | Post-learning v.s. Prelearning | 1.17  | 0.82–1.66   | 0.38    |
|                      | ELs low v.s. high              | 0.08  | 0.048–0.13  | <0.001  |

OR: odds ratio, CI: confidence interval, ELs: evidence level

**eTable 6.** Concordance of Treatment Recommendations for AMG 650

|                     | Concordance rate (%) |        |      |
|---------------------|----------------------|--------|------|
|                     | Mean                 | Median | SD   |
| MTBs (n = 27)       | 31.3                 | 22.2   | 0.34 |
| Physicians (n = 14) | 36.5                 | 5.6    | 0.43 |
| AI (n = 1)          | 88.9                 | -      | -    |

## **eMethods.** Details of Multivariable Mixed-Effects Model

The logistic mixed effects model consisted of the fixed-effect term for two variables and the random intercept term. The random intercept was used to deal with the heterogeneity of participants in the models. The fixed-effect variables were pre- and post- learning evaluations and the level of evidence.

In terms of interaction terms, since an interaction between learning evaluations and evidence levels was not considered during the planning stage, we adopted a no-interaction model in the analysis, the results of which are presented in Table 1. As a post hoc analysis, we compared the goodness-of-fit of the no-interaction model with the model that included the interaction using Akaike information criterion (AIC). The AIC values for the no-interaction and interaction models were 1234.2 and 1236.1 for MTBs and 639.4 and 640.6 for physicians, respectively. As both models exhibited similar goodness-of-fit, we reported the results based on the no-interaction model, as originally planned.

The model's predictive performance was evaluated using the mean area under the receiver operating characteristic curve (AUROC) obtained from 200 iterations of 5-fold cross-validation. The mean AUROCs were 0.811 and 0.828 for MTBs and physicians, respectively.
