# Supplementary material for: A Learning Program for Treatment Recommendations by Molecular Tumor Boards and Artificial Intelligence
Source: PubMed Central journal article supplement — JAMA Oncol. 2023 Nov 30;10(1):95–102. doi: 10.1001/jamaoncol.2023.5120 (PMC10690580; doi:10.1001/jamaoncol.2023.5120), 2023-11-30
Supplement: jamaoncol-e235120-s002.pdf [file jamaoncol-e235120-s002.pdf]

## Data Sharing Statement

Sunami. A Learning Program for Treatment Recommendations by Molecular Tumor Boards and Artificial Intelligence. *JAMA Oncol.* Published November 30, 2023.  
doi:10.1001/jamaoncol.2023.5120

### Data

**Data available:** No
